# Supplementary material
Source: PubMed Central journal article supplement (PMC3778165)
Supplement: NIHMS497115-supplement-1_si_001.pdf [file NIHMS497115-supplement-1_si_001.pdf]

Supp

(A)

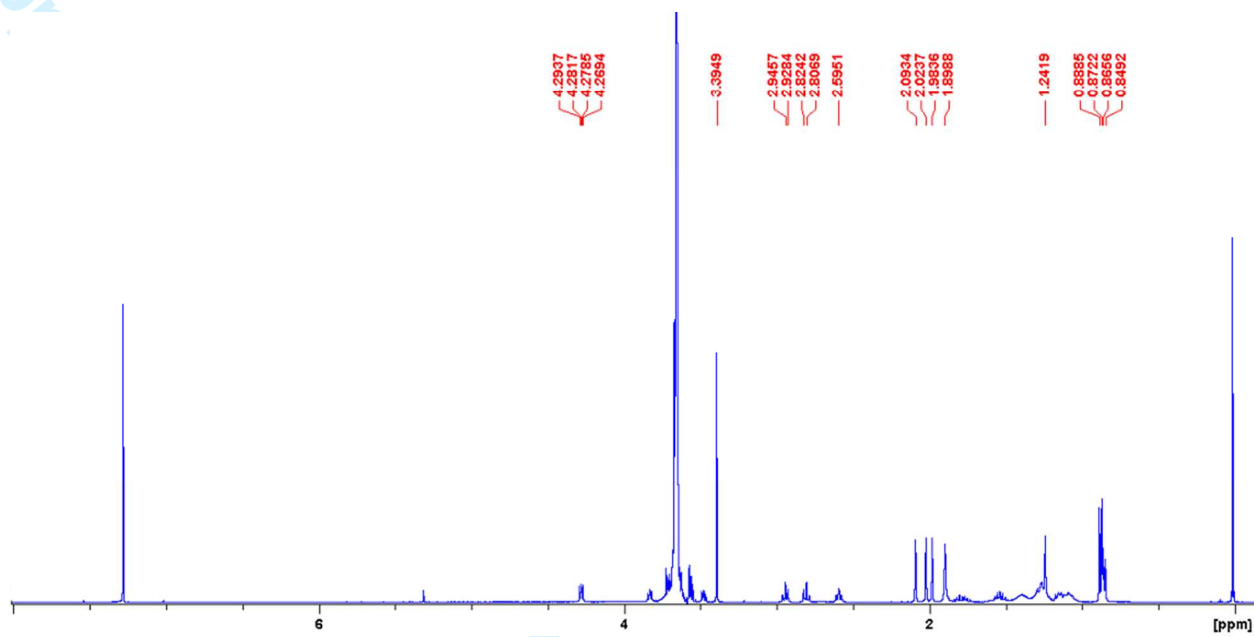

(B)

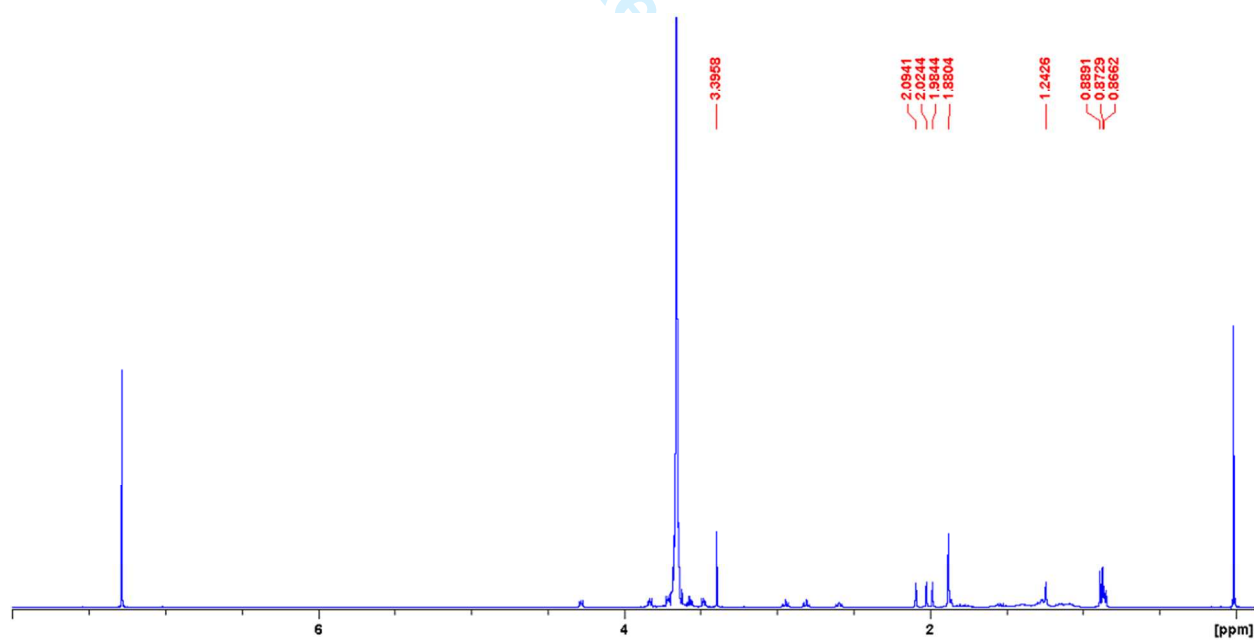

lication

Supp  
(C)

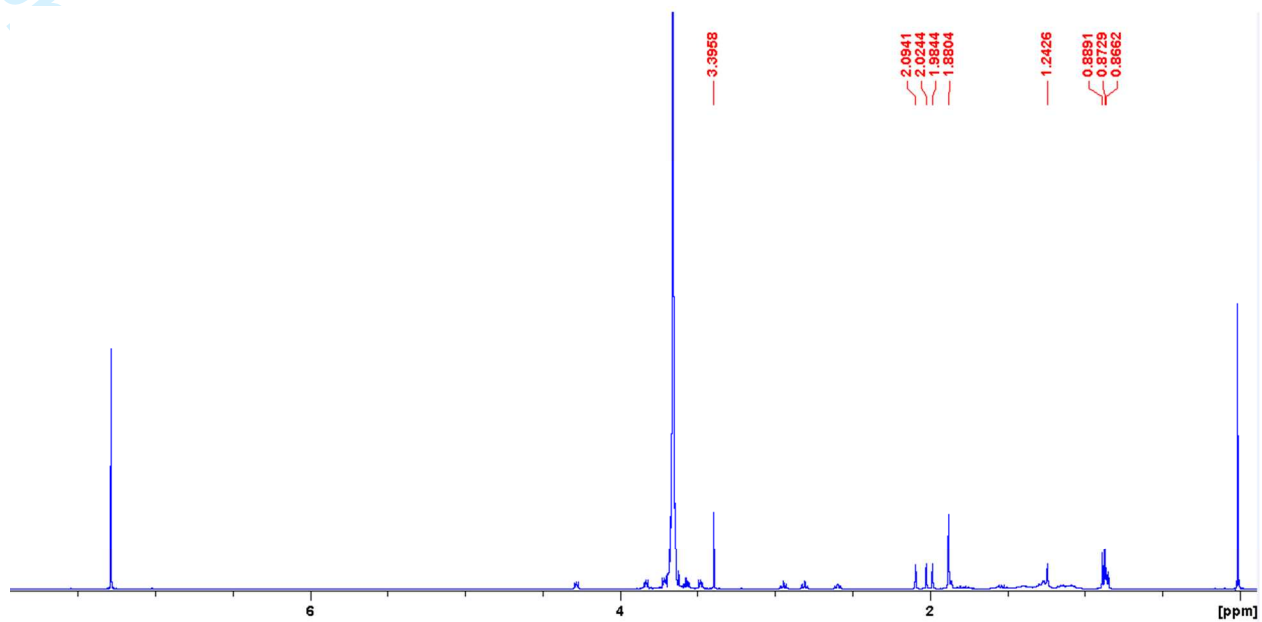

(D)

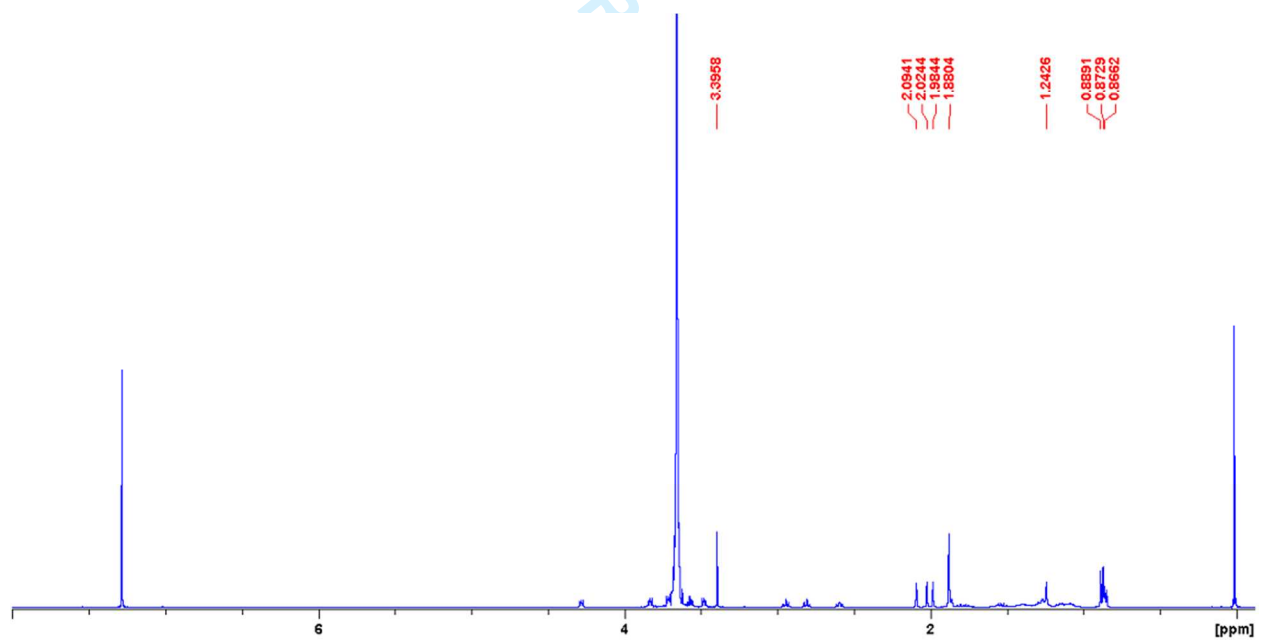

**Fig. S1.**  $^1\text{H}$  NMR spectra (400MHz) of  $\text{PEG}_{5\text{K}}\text{-VE}_2$  (A),  $\text{PEG}_{5\text{K}}\text{-VE}$  (B),  $\text{PEG}_{2\text{K}}\text{-VE}_2$  (C) and  $\text{PEG}_{2\text{K}}\text{-VE}$  (D) conjugates in  $\text{CDCl}_3$ .

ublication

Supra

(A)

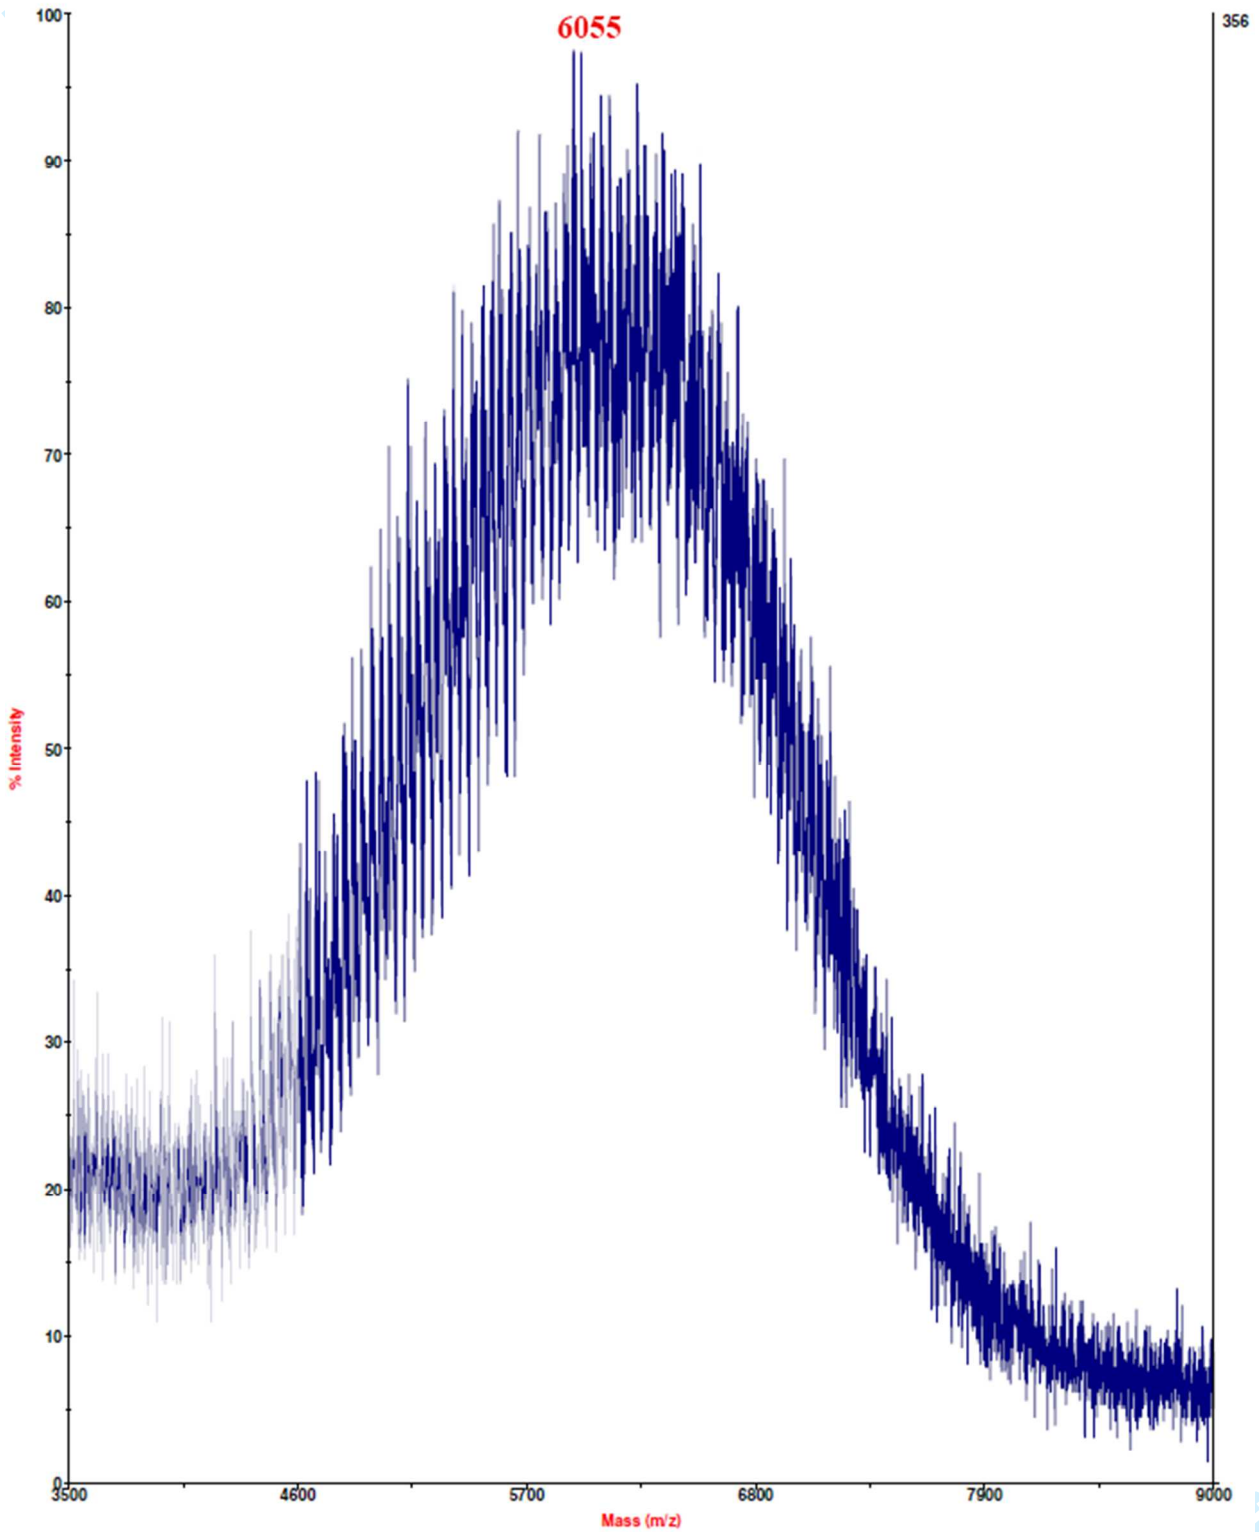

ion

SUP  
(B)

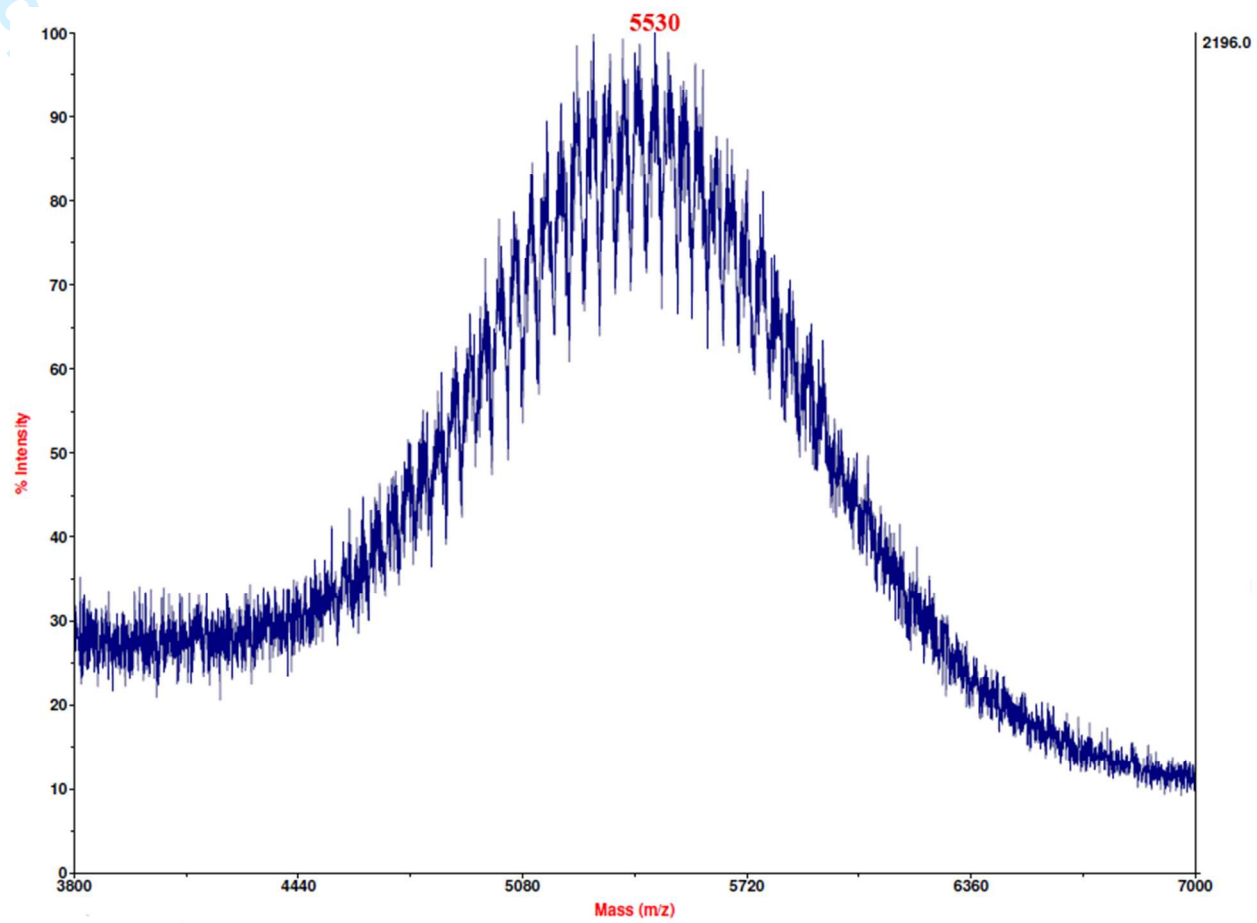

SUP  
(C)

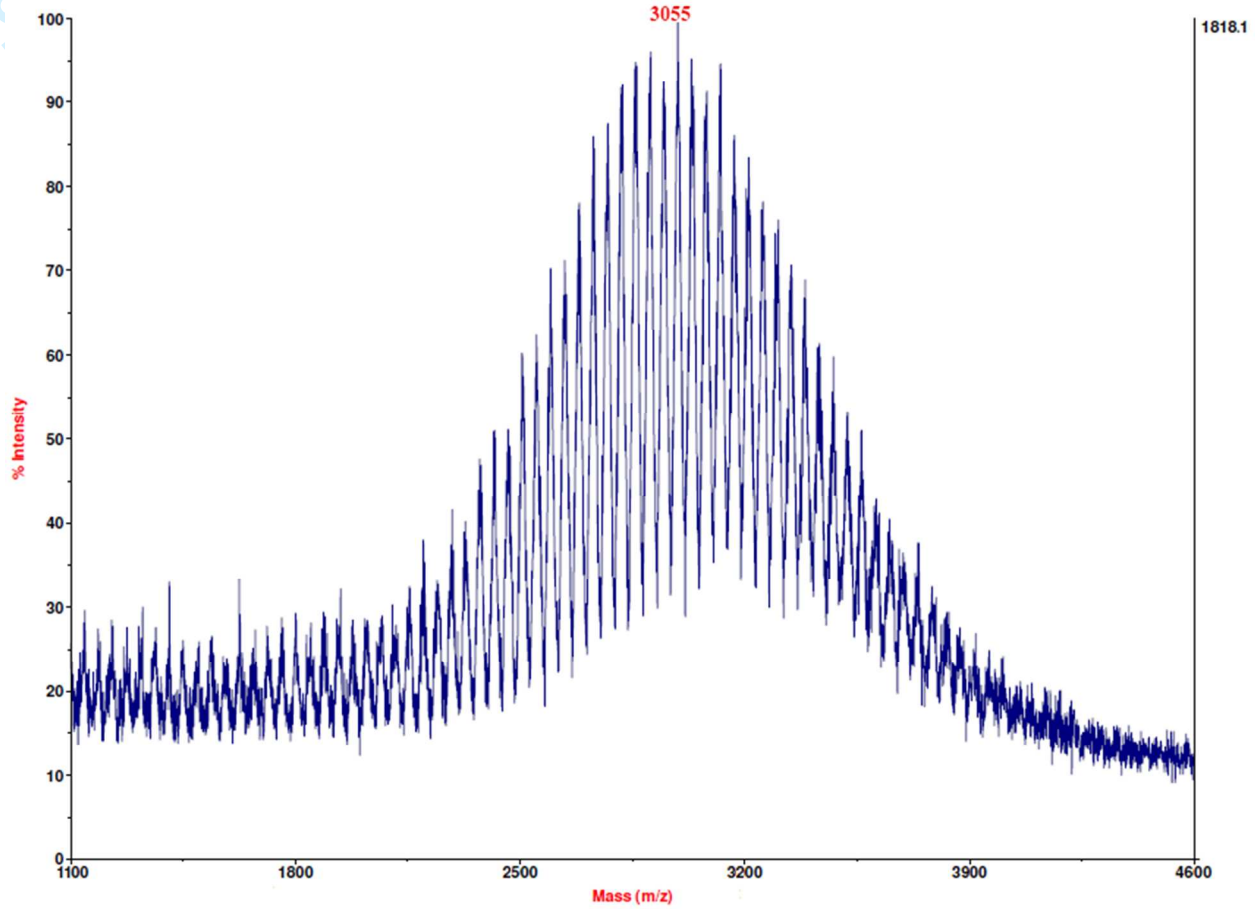

Only - Not for Publication

Supp  
(D)

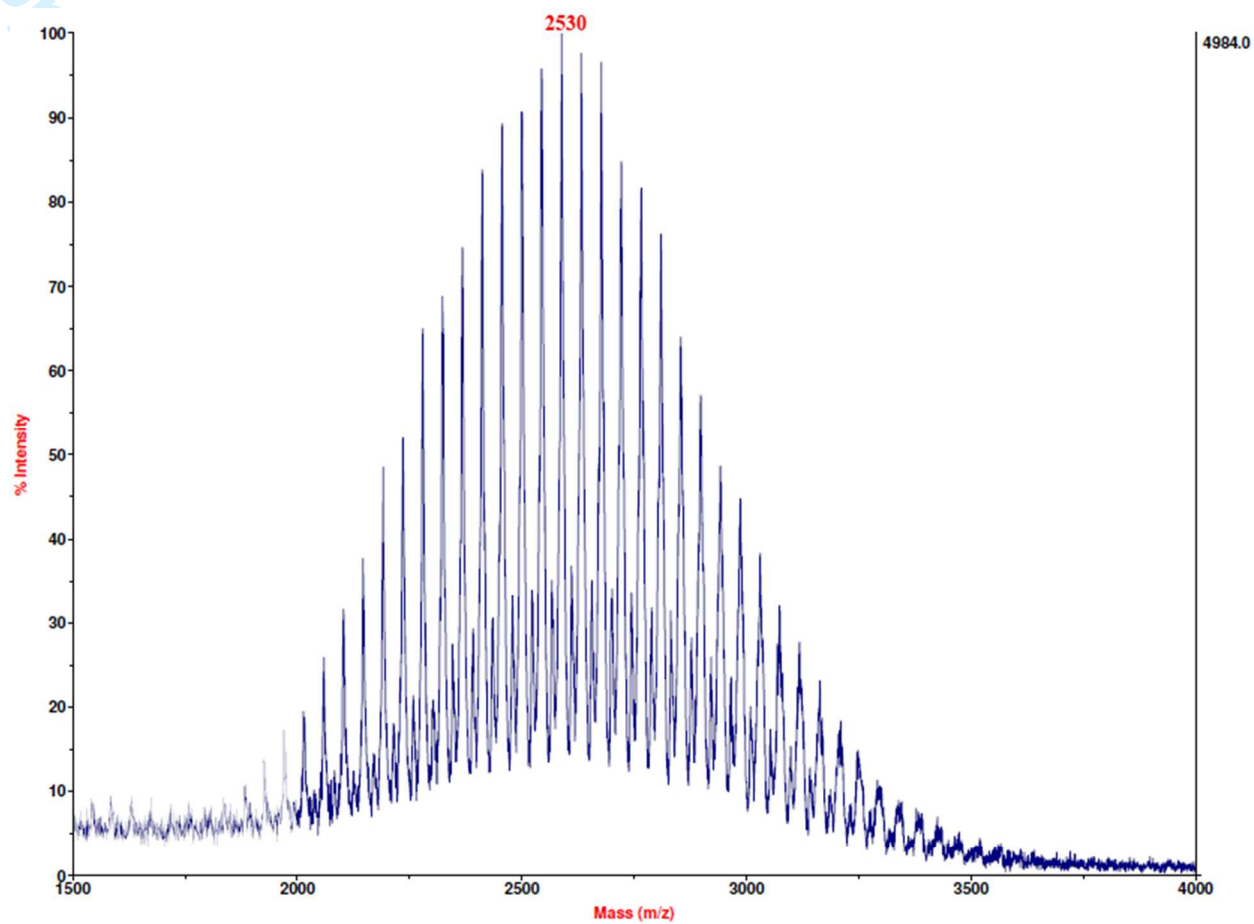

Fig. S2. MADLI-TOF of PEG<sub>5K</sub>-VE<sub>2</sub> (A), PEG<sub>5K</sub>-VE (B), PEG<sub>2K</sub>-VE<sub>2</sub> (C) and PEG<sub>2K</sub>-VE (D) conjugates.

Only - Not for Publication

(A)

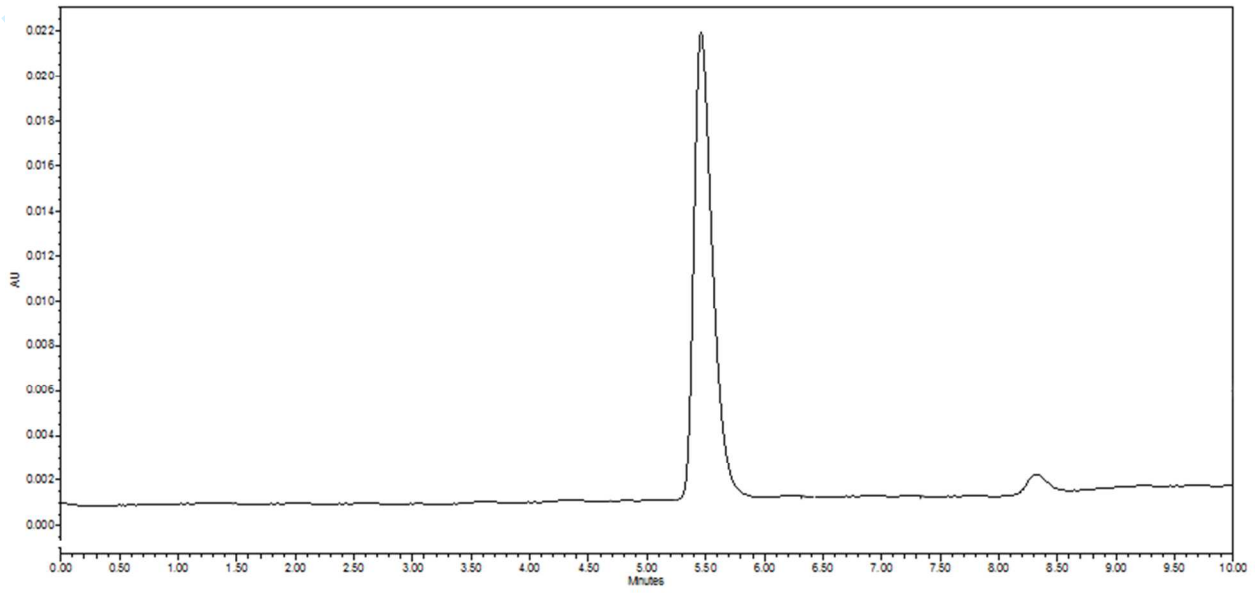

| Peak | Retention Time | Area   | % Area | Height |
|------|----------------|--------|--------|--------|
| 1    | 5.461          | 227225 | 96.04  | 20742  |
| 2    | 8.329          | 9377   | 3.96   | 814    |

Purity = 96.04%

(B)

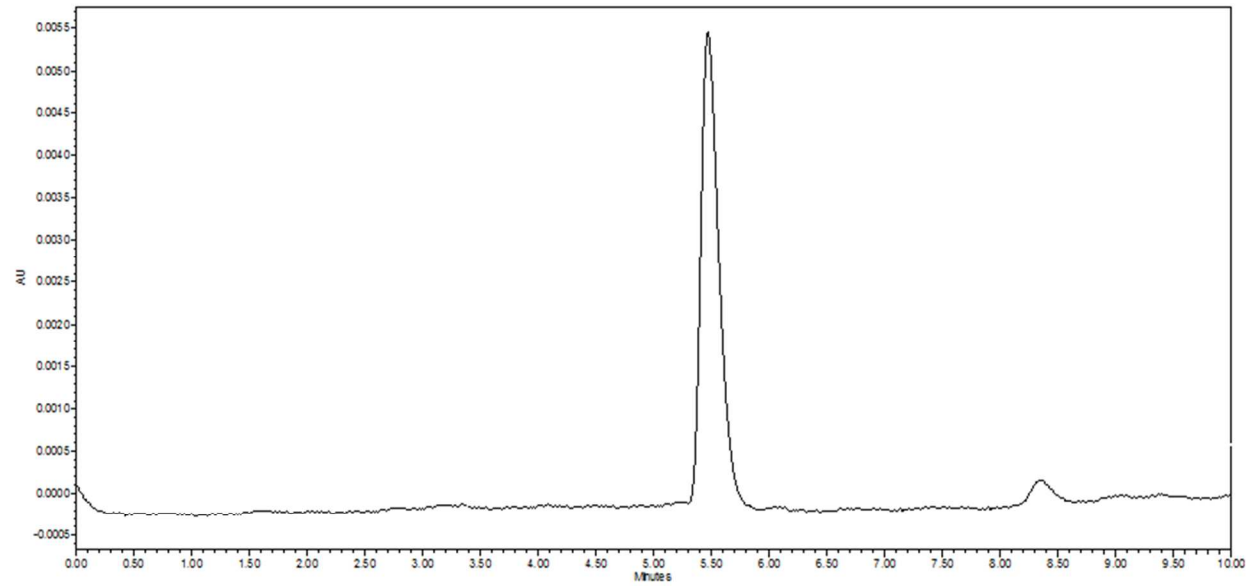

| Peak | Retention Time | Area  | % Area | Height |
|------|----------------|-------|--------|--------|
| 1    | 5.468          | 60144 | 94.32  | 5587   |
| 2    | 8.352          | 3623  | 5.68   | 288    |

Purity = 94.32%

Supra

(C)

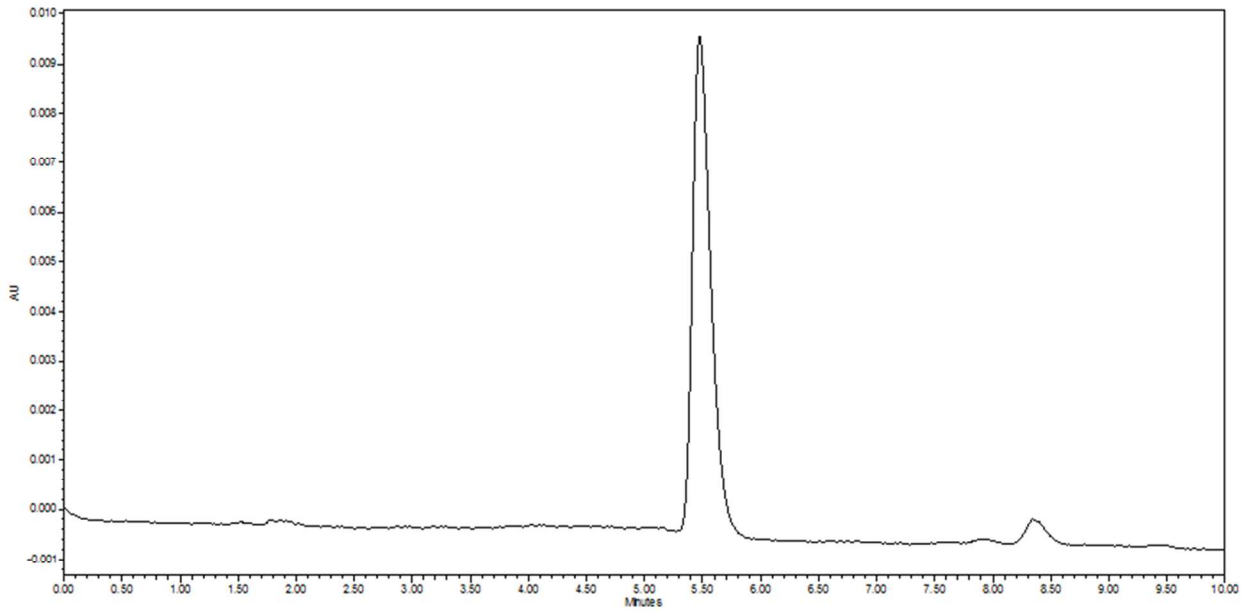

| Peak | Retention Time | Area   | % Area | Height |
|------|----------------|--------|--------|--------|
| 1    | 5.476          | 108494 | 95.06  | 10016  |
| 2    | 8.344          | 5641   | 4.94   | 483    |

Purity = 95.06%

(D)

evi

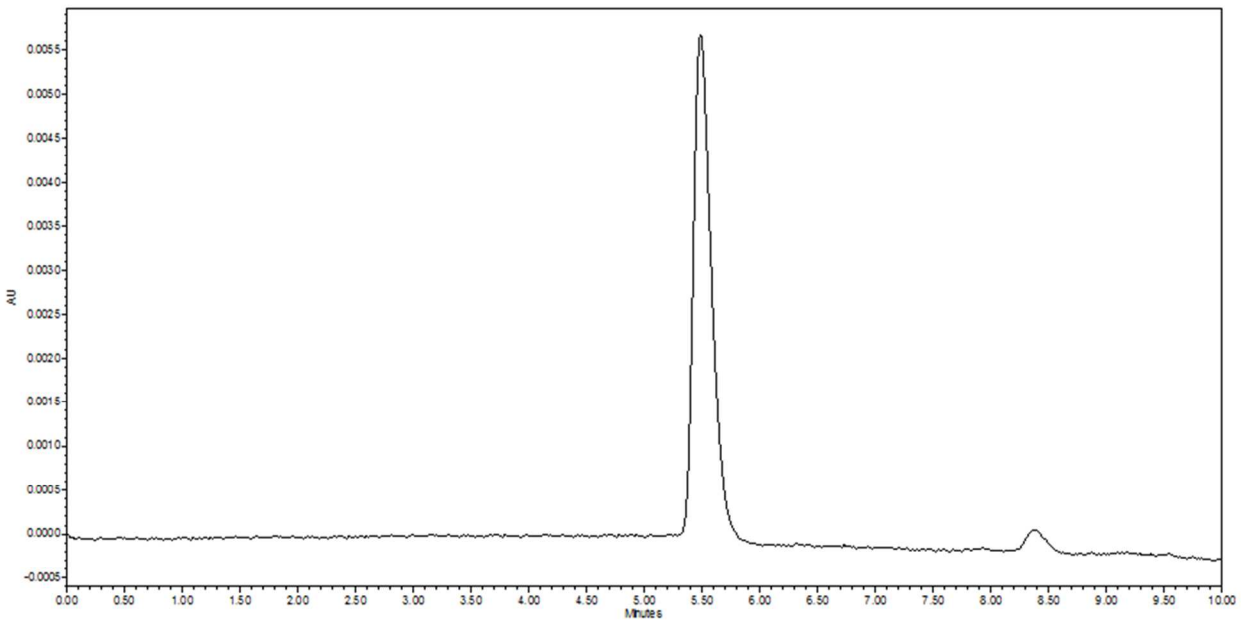

| Peak | Retention Time | Area  | % Area | Height |
|------|----------------|-------|--------|--------|
| 1    | 5.485          | 62531 | 95.57  | 5717   |
| 2    | 8.389          | 2898  | 4.43   | 251    |

Purity = 95.57%

ion



**Fig. S3.** HPLC trace of PEG<sub>5K</sub>-VE<sub>2</sub> (A), PEG<sub>5K</sub>-VE (B), PEG<sub>2K</sub>-VE<sub>2</sub> (C) and PEG<sub>2K</sub>-VE (D) conjugates.

Supporting Information - For Review Only - Not for Publication

**(A)**

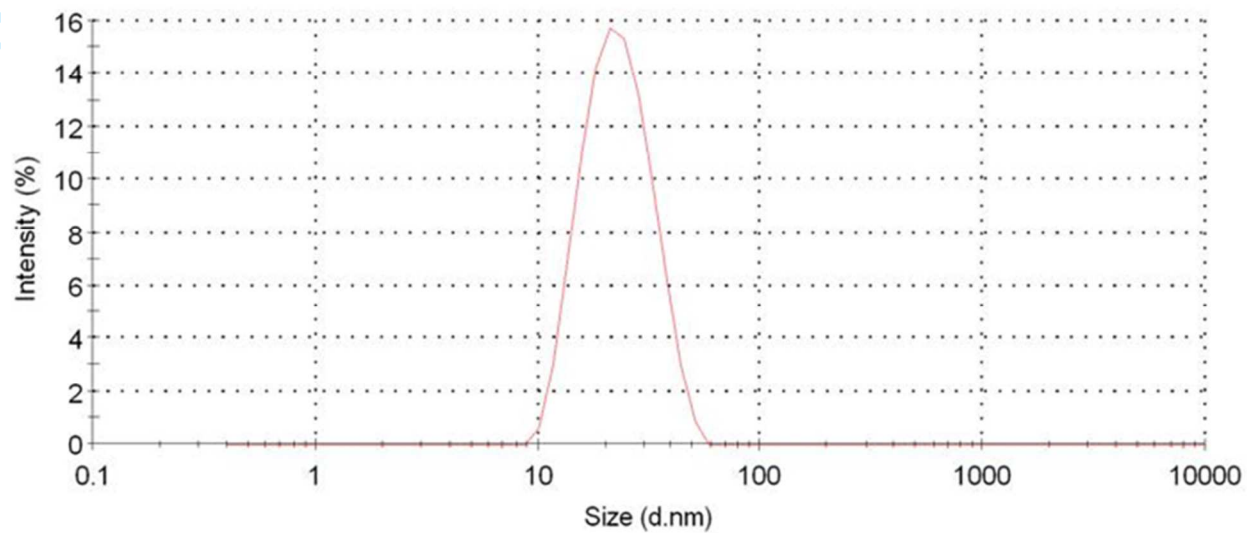

**(B)**

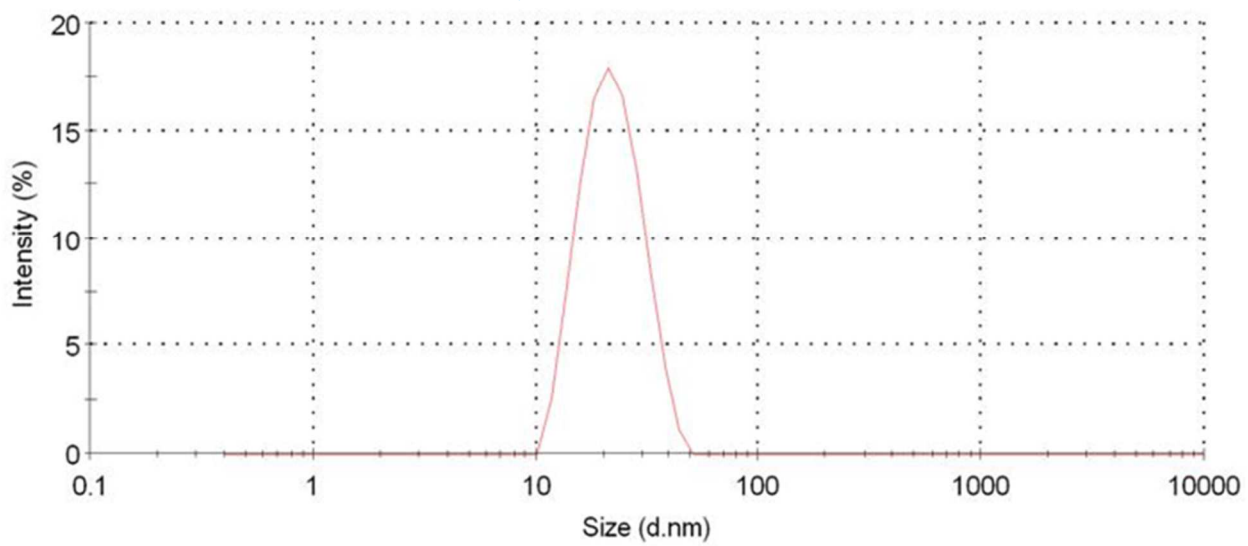

Not for Publication

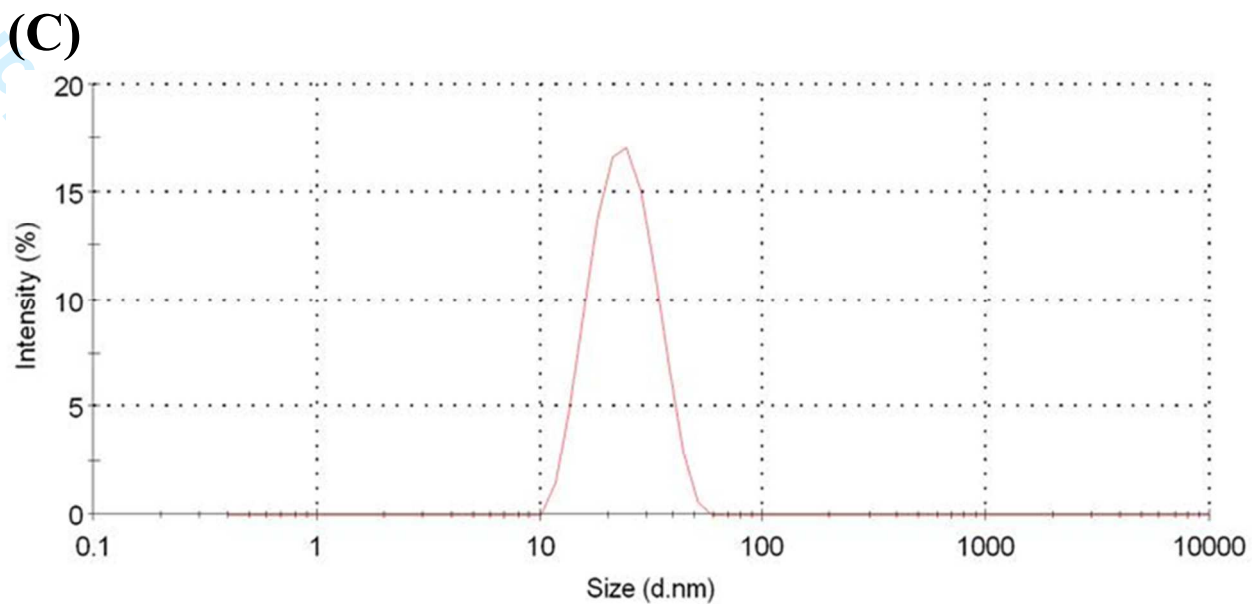

**Fig. S4.** The size distribution of free PEG<sub>5K</sub>-VE (A), PEG<sub>2K</sub>-VE<sub>2</sub> (B) and PEG<sub>2K</sub>-VE (C) nanoparticles in PBS measured by dynamic light scattering (DLS).

(A)

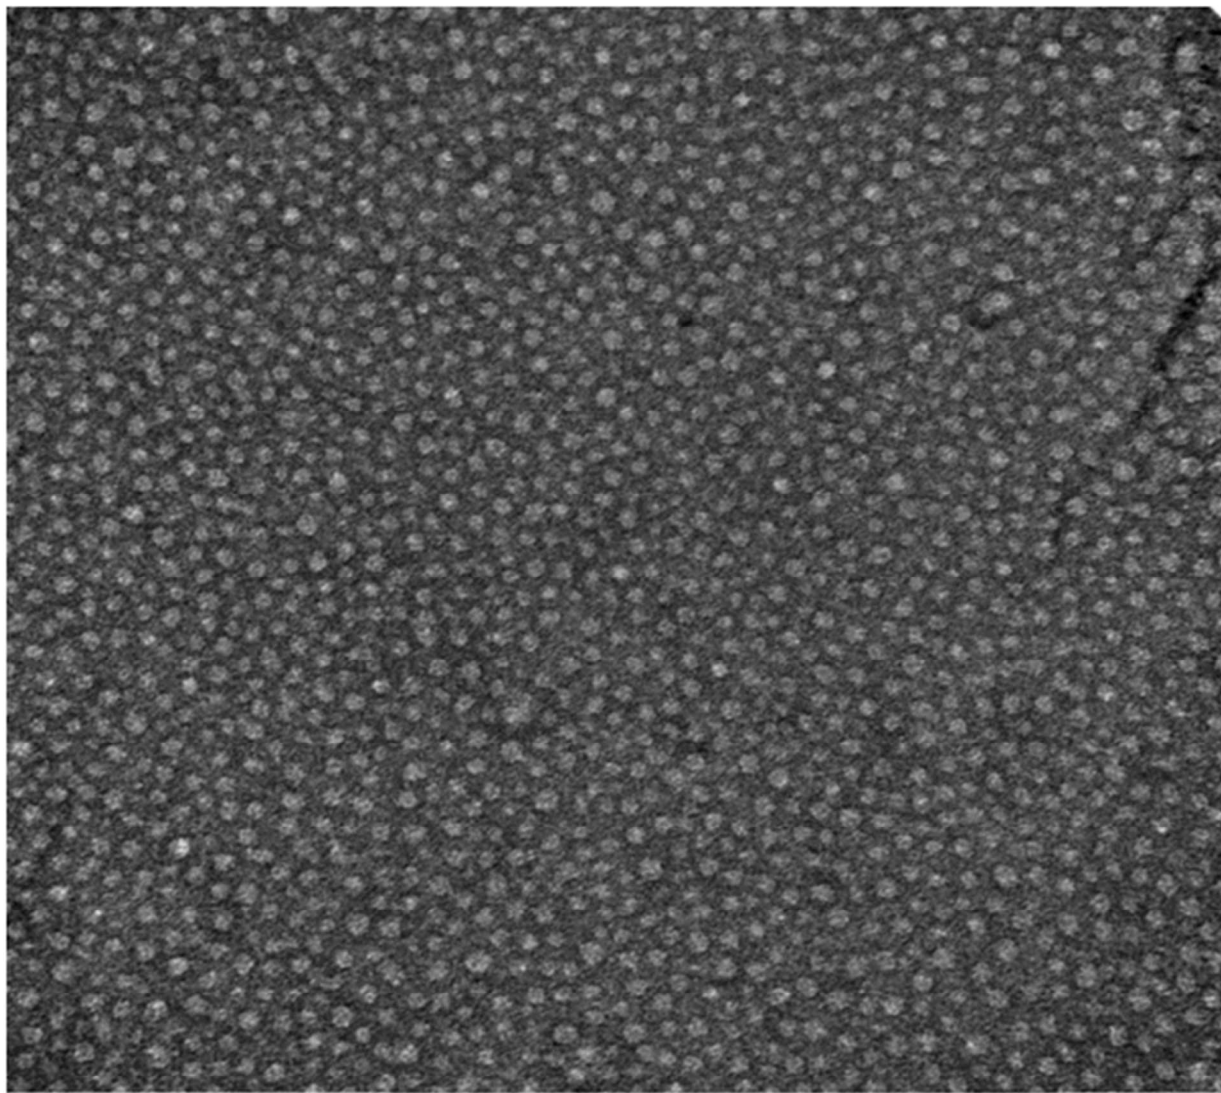

100 nm

Not for Publication

**(B)**

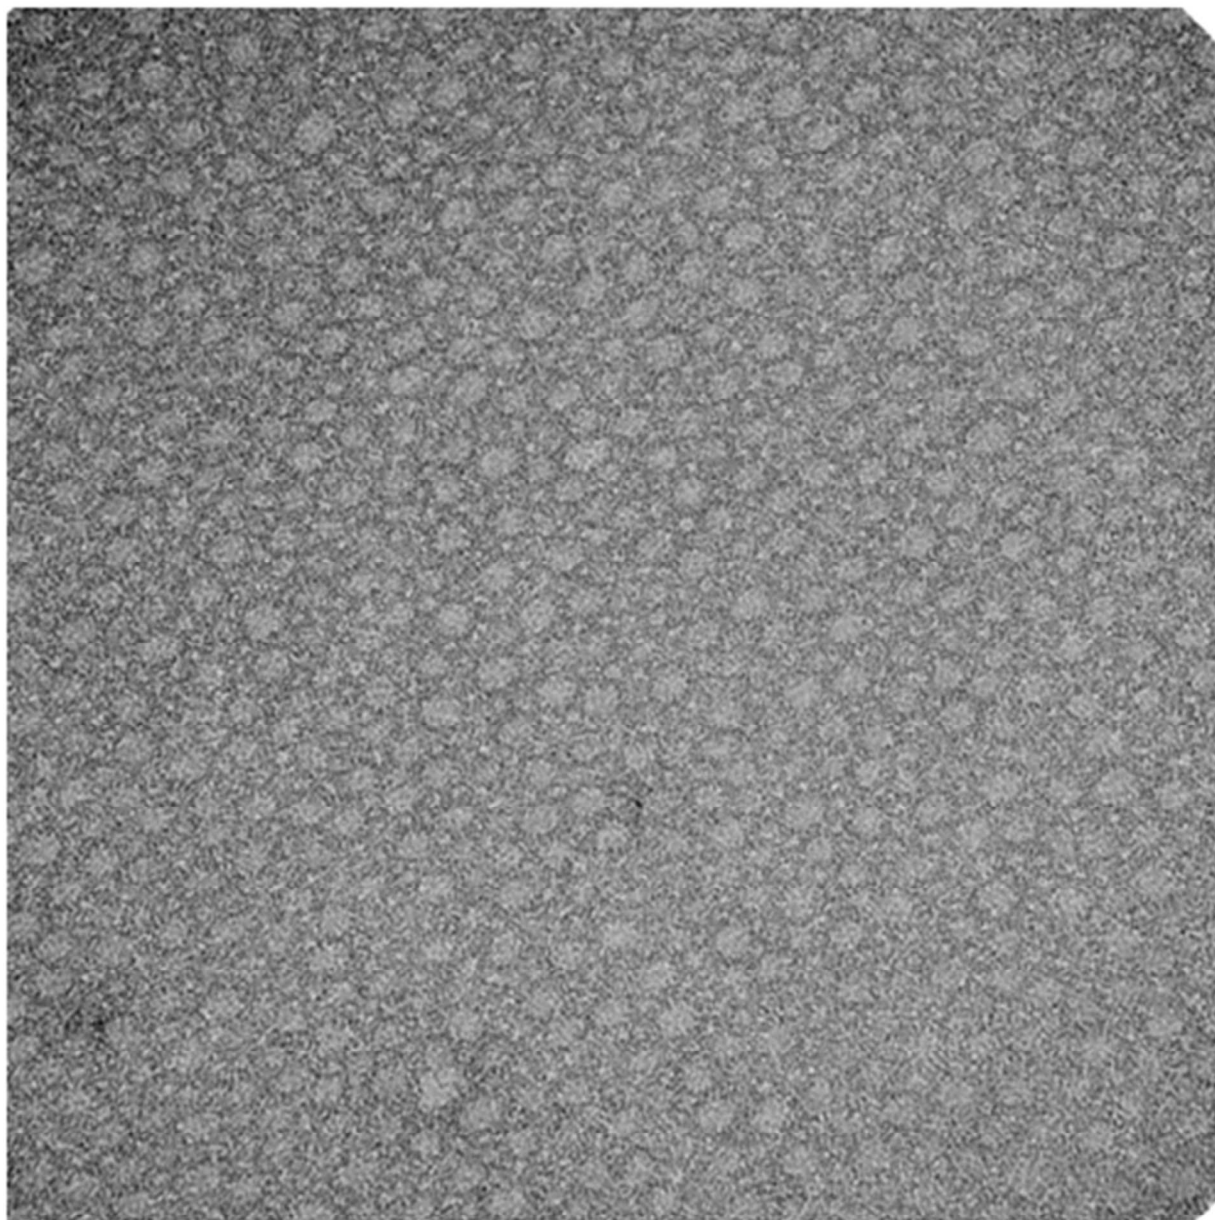

**100 nm**

Publication



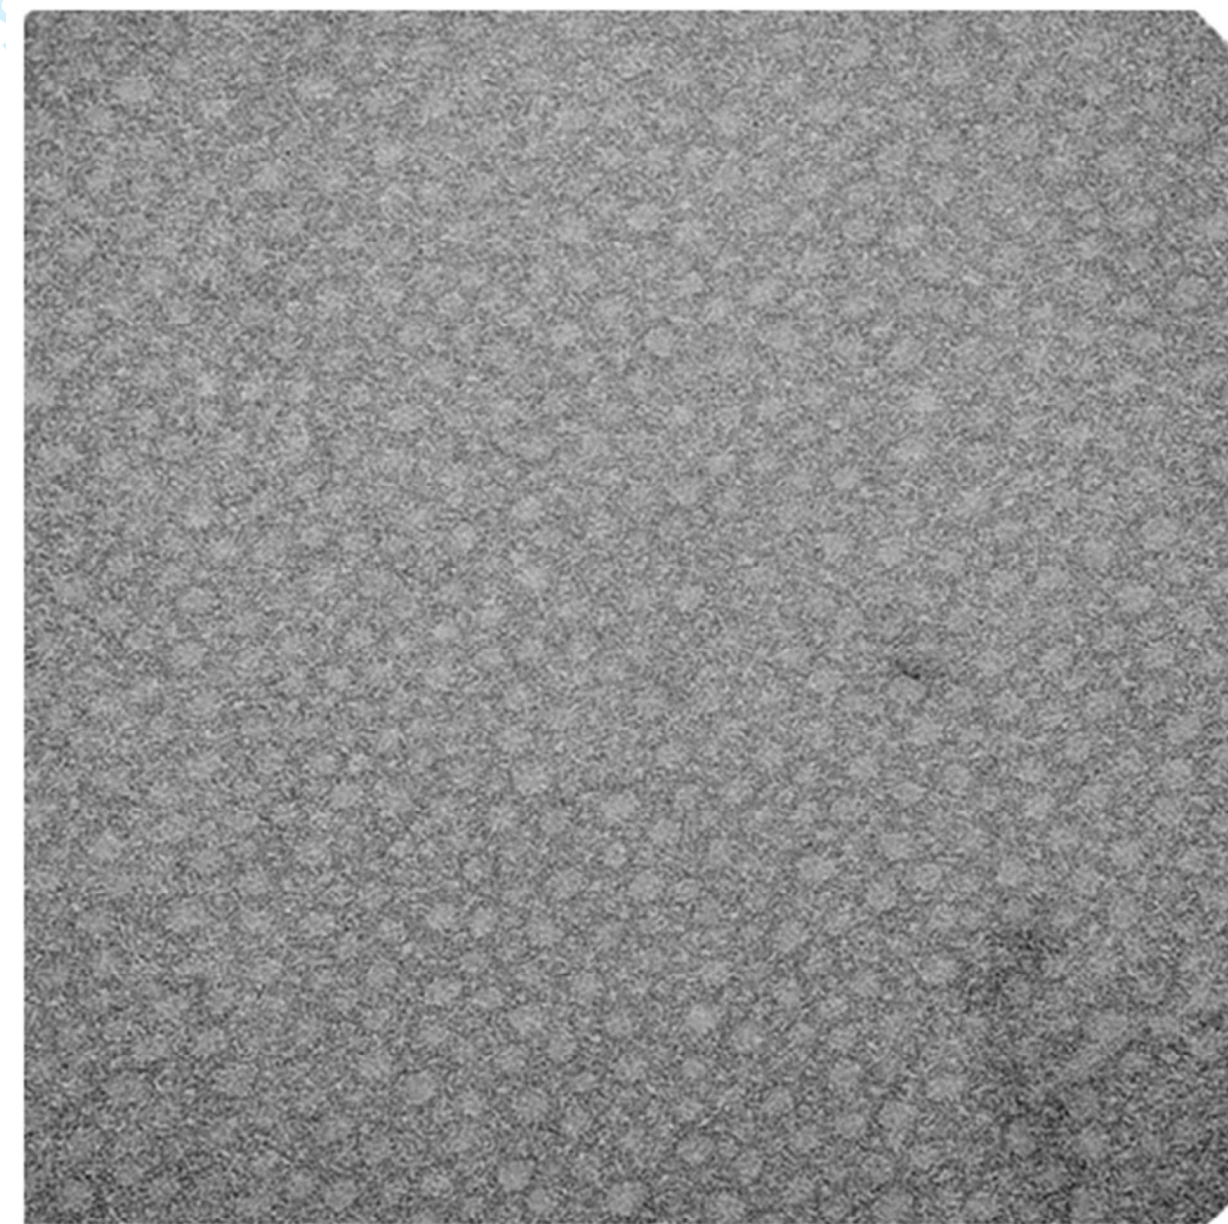

100 nm

**Fig. S5.** Transmission electron microscopy of PEG<sub>5K</sub>-VE (A), PEG<sub>2K</sub>-VE<sub>2</sub> (B) and PEG<sub>2K</sub>-VE (C) nanoparticles.
